# Supplementary material for: Third-order nonlinear optical properties of 3,4-ethylenedioxythiophene copolymers with chalcogenadiazole acceptors
Source: Royal Society of Chemistry journal article supplement (doi:10.1039/c4nj01899k), 2015-01-01
Supplement: c4nj01899k1.pdf [file c4nj01899k1.pdf]

Supplementary Material (ESI) for New Journal of Chemistry

This journal is Royal Society of Chemistry 2015

**Third-order nonlinear optical properties of 3,4-ethylenedioxythiophene copolymers with chalcogenadiazole acceptors**

Sona Narayanan,<sup>a§</sup> Sreejesh Poikavila Raghunathan,<sup>a†</sup> Aby Cheruvathoor Poulse,<sup>bδ</sup> Sebastian Mathew,<sup>cδ</sup> Krishnapillai Sreekumar,<sup>dΣ</sup> Cheranellore Sudha Kartha,<sup>c†</sup> Rani Joseph<sup>a\*</sup>

<sup>a</sup>Department of Polymer Science and Rubber Technology, Cochin University of Science and Technology, Cochin-682022, Kerala, India

<sup>b</sup>Bio-Nano Electronics Research Centre, Toyo University, Tokyo, Japan

<sup>c</sup>International School of Photonics, Cochin University of Science and Technology, Cochin-682022, Kerala, India

<sup>d</sup>Department of Applied Chemistry, Cochin University of Science and Technology, Cochin-682022, Kerala, India

<sup>e</sup>Department of Physics, Cochin University of Science and Technology, Cochin-682022, Kerala, India

\*Corresponding author. E-mail.: rani@cusat.ac.in, ranigeorge2011@gmail.com, Tel.: 09446467850

§E-mail: sonachalil@gmail.com; †E-mail: prsreejesh@gmail.com; δE-mail: abypoulse@gmail.com;

δE-mail: mathewphys@gmail.com; ΣE-mail: ksk@cusat.ac.in; †E-mail: csk@cusat.ac.in

Additional figure, FT-IR spectra of copolymers (Fig. S1) is available as supporting information.

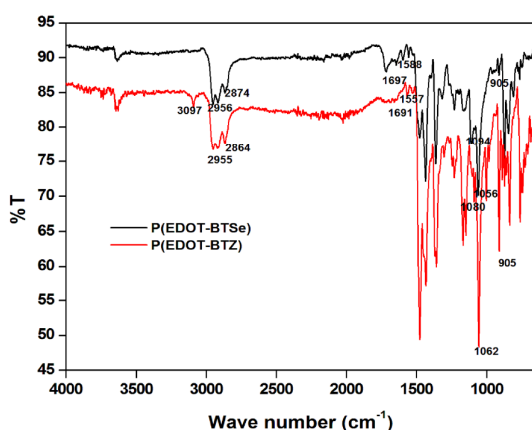

Fig. S1 FT-IR spectra of P(EDOT-BTZ) and P(EDOT-BTSe).
